# Supplementary material for: Lipidomic profiling of virus infection identifies mediators that resolve herpes simplex virus-induced corneal inflammatory lesions
Source: Royal Society of Chemistry journal article supplement (doi:10.1039/d0an00263a), 2020-01-01
Supplement: d0an00263a1.pdf [file d0an00263a1.pdf]

### Supplementary data

**Table S1. The liquid chromatographic separation conditions**

|                     |                                                                  |
|---------------------|------------------------------------------------------------------|
| <b>Flow rate</b>    | 300µl/min                                                        |
| <b>Temp</b>         | 50 °C                                                            |
| <b>Solvent</b>      | Phase A: H <sub>2</sub> O/Hexane/Acetic acid (70:30:0.02, v/v/v) |
|                     | Phase B: Hexane/IPA (50:50, v/v)                                 |
| <b>Gradient(B%)</b> | 0 min-0%                                                         |
|                     | 3 min-25%                                                        |
|                     | 11 min-45%                                                       |
|                     | 13 min-60%                                                       |
|                     | 18 min-75%                                                       |
|                     | 18.5 min-90%                                                     |
|                     | 20 min-90%                                                       |
|                     | 21 min-0%                                                        |
|                     | Held until 25 min                                                |

**Table S2. The parameters of the MRM method**

| <b>Parameter</b>                         | <b>Mode</b>              |
|------------------------------------------|--------------------------|
|                                          | <b>Negative ion mode</b> |
| Ion source                               | Turbo spray              |
| Curtain gas (p.s.i)                      | 10.0 p.s.i               |
| Collisional activated dissociation (CAD) | High(-20V to -45V)       |
| Ion spray voltage                        | -4500.0V                 |
| Temperature                              | 525.0 °C                 |
| Ion source gas                           | 40.0 p.s.i               |
| Declustering potential (DP)              | -30.0V                   |
| Entrance potential (EP)                  | -15.0V                   |
| Collision cell exit potential (CXP)      | -15.0                    |

**Table S3. The MRM transitions and the collision energy (CE) values selected for each lipid**

| Class | Lipid mediator  | Transitions<br>(Q1/Q3)        | CE<br>(ev) | Internal standard | Stability<br>RSD% |
|-------|-----------------|-------------------------------|------------|-------------------|-------------------|
| AA    | 12-HHT          | 279/163                       | -25        | 12-HETE-d8        | 0.70              |
|       | 11-HETE         | 319.1/167.1                   | -25        | 12-HETE-d8        | 10.53             |
|       | 12-HETE         | 319/179                       | -25        | 12-HETE-d8        | 7.74              |
|       | 15-HETE         | 319/175                       | -25        | 12-HETE-d8        | 10.24             |
|       | 20-HETE         | 319/245                       | -25        | 12-HETE-d8        | 9.56              |
|       | 5-HETE          | 319/115                       | -25        | 12-HETE-d8        | 14.64             |
|       | 8,9-DHET        | 319/155                       | -25        | 11,12-EET-d11     | 7.26              |
|       | 8-HETE          | 319.01/155.01                 | -25        | 12-HETE-d8        | 11.51             |
|       | 9-HETE          | 319/151                       | -25        | 12-HETE-d8        | 6.71              |
|       | 11,12-DHET      | 337/167                       | -25        | 11,12-EET-d11     | 0.00              |
|       | 14,15-DHET      | 337/207                       | -25        | 11,12-EET-d11     | 0.03              |
|       | 5,6-DHET        | 337/145                       | -25        | 11,12-EET-d11     | 11.15             |
|       | 8,9-EET         | 319/127                       | -20        | 11,12-EET-d11     | 13.89             |
|       | 11,12-EET       | 319/167                       | -20        | 11,12-EET-d11     | 12.68             |
|       | HXB3            | 335/183                       | -20        | 11,12-EET-d11     | 14.87             |
|       | 15-deoxy-PGA2   | 315/271                       | -15        | PGD2-EA-d4        | 8.25              |
|       | 15-deoxy-PGJ2   | 315.01/271.01                 | -15        | PGD2-EA-d4        | 14.72             |
|       | PGEM            | 327/291                       | -15        | PGD2-EA-d4        | 9.08              |
|       | PGFM            | 329/293                       | -15        | PGD2-EA-d4        | 10.05             |
|       | bicyclo PGE2    | 333/113                       | -15        | PGD2-EA-d4        | 10.57             |
| PGA2  | 333/271         | -15                           | PGD2-EA-d4 | 13.71             |                   |
| PGB2  | 333/175         | -15                           | PGD2-EA-d4 | 7.35              |                   |
| Class | Lipid mediator  | Transitions<br>( <i>m/z</i> ) | CE<br>(ev) | Internal standard | Stability<br>RSD% |
| AA    | PGJ2            | 333/189                       | -15        | PGD2-EA-d4        | 3.72              |
|       | 15d PGD2        | 333.01/271.01                 | -15        | PGD2-EA-d4        | 11.26             |
|       | 15k PGE2        | 349/113                       | -15        | PGD2-EA-d4        | 9.60              |
|       | PGD2            | 351/271                       | -15        | PGD2-EA-d4        | 8.34              |
|       | PGE2            | 351/189                       | -15        | PGD2-EA-d4        | 0.00              |
|       | 11 $\beta$ PGE2 | 351.02/271.02                 | -15        | PGD2-EA-d4        | 11.05             |
|       | dh PGF2a        | 355/275                       | -15        | PGD2-EA-d4        | 13.36             |
|       | dihomo PGD2     | 379/299                       | -15        | PGD2-EA-d4        | 0.00              |
|       | LXB5            | 349/219                       | -20        | LTB4-d4           | 8.26              |
|       | LXA4            | 351/115                       | -20        | LTB4-d4           | 2.65              |
|       | 6R-LXA4         | 351.01/115.01                 | -20        | LTB4-d4           | 12.36             |
|       | 15-HpETE        | 335/113                       | -25        | 12-HETE-d8        | 13.44             |
|       | 12-HpETE        | 335/153                       | -25        | 12-HETE-d8        | 9.99              |
|       | 5-HpETE         | 335/155                       | -25        | 12-HETE-d8        | 12.08             |
|       | AA              | 303/259                       | -20        | 12-HETE-d8        | 7.00              |
|       | 15-oxo-ETE      | 317/113                       | -20        | 12-HETE-d8        | 11.96             |

|      |                             |               |     |                   |       |
|------|-----------------------------|---------------|-----|-------------------|-------|
|      | 5-HEPE                      | 317/115       | -20 | 12-HETE-d8        | 14.08 |
|      | 5-oxo-EETE                  | 317/203       | -25 | 12-HETE-d8        | 2.37  |
|      | TXB2                        | 369/169       | -25 | PGD2-EA-d4        | 13.14 |
|      | 2,3 dinor-11 $\beta$ -PGF2a | 325/145       | -15 | PGD2-EA-d4        | 12.82 |
|      | 15-epi-LXA4                 | 351.02/115.02 | -20 | LTB4-d4           | 4.27  |
| LA   | 9,10-EpOME                  | 295.1/171.1   | -20 | 13-HODE-d4        | 2.89  |
|      | 12,13-EpOME                 | 295.01/195.01 | -20 | 13-HODE-d4        | 5.43  |
|      | 13-oxoODE                   | 293/113       | -25 | 13-HODE-d4        | 0.33  |
|      | 9-oxoODE                    | 293/185       | -25 | 13-HODE-d4        | 0.00  |
|      | 9-HODE                      | 295/171       | -25 | 13-HODE-d4        | 0.00  |
|      | 13-HODE                     | 295/195       | -25 | 13-HODE-d4        | 10.74 |
| DGLA | 15k PGF1a                   | 353/113       | -15 | 13-HODE-d4        | 9.24  |
|      | TXB1                        | 371/171       | -25 | 13-HODE-d4        | 2.56  |
|      | 6,15 dk-,dh-PGF1a           | 369/113       | -15 | 13-HODE-d4        | 0.00  |
| EPA  | PGD3                        | 349/269       | -15 | 14,15-DiHETrE-d11 | 11.85 |
|      | PGE3                        | 349.01/269.01 | -15 | 14,15-DiHETrE-d11 | 0.00  |
|      | RvE3                        | 333/163       | -20 | 14,15-DiHETrE-d11 | 18.66 |
|      | RvE2                        | 333/199       | -20 | 14,15-DiHETrE-d11 | 0.00  |
|      | 18-HEPE                     | 317/259       | -25 | 14,15-DiHETrE-d11 | 14.08 |
| EPA  | TXB3                        | 367/169       | -25 | 14,15-DiHETrE-d11 | 1.85  |
| DHA  | 4-HDHA                      | 343/101       | -25 | 14,15-DiHETrE-d11 | 0.00  |
|      | 14S-21-diHDHA               | 359/205       | -25 | 14,15-DiHETrE-d11 | 13.65 |
|      | 1-Mar                       | 359/221       | -25 | 14,15-DiHETrE-d11 | 4.64  |
|      | RvD3                        | 375/147       | -20 | 14,15-DiHETrE-d11 | 0.00  |

**Table S4. The primers of target genes for qRT-PCR**

| Gene                          | Primers                                                          |
|-------------------------------|------------------------------------------------------------------|
| <i>VSV</i>                    | Forward: ACGGCGTACTTCCAGATGG<br>Reverse: CTCGGTTCAAGATCCAGGT     |
| <i>HSV-1</i>                  | Forward: GCTCGAGTGCGAAAAACGTTC<br>Reverse: CGGGGCGCTCGGCTAAC     |
| <i>Ifna2</i>                  | Forward: TACTCAGCAGACCTTGAACCT<br>Reverse: CAGTCTTGGCAGCAAGTTGAC |
| <i>Ifn<math>\beta</math>1</i> | Forward: GGCAGTGTAACCTTCTGCAT<br>Reverse: CAGCTCCAAGAAAGGACGAAC  |
| <i>Tnfa</i>                   | Forward: GACGTGGAAGTGGCAGAAGAG<br>Reverse: TTGGTGGTTTGTGAGTGTGAG |
